# Supplementary material for: Degradation of Polymer-Drug Conjugate Nanoparticles Based on Lactic and Itaconic Acid
Source: MDPI journal article supplement (doi:10.3390/ijms232214461), 2022-11-21
Supplement: s1 [file s1]

# Supporting Information

## 1. Spectroscopic data of PLA-ITA polymer

From the integration ratio between lactate and itaconate  $^1\text{H}$  NMR peaks, the molecular weight of PLA-ITA was estimated as  $M_n = 3850\text{--}4050\text{ g}\cdot\text{mol}^{-1}$ .

The peaks of IR, NMR, and MS are listed as follows:

- IR (neat,  $\text{cm}^{-1}$ ): 2995, 1755, 1456, 1382, 1359, 1211, 1182, 1130, 1087, 4043, 871;
- $^1\text{H}$  NMR (300 MHz,  $\text{CDCl}_3$ )

| Chemical shift (ppm) | Multiplicity | Number of protons | J coupling (Hz) | Assignment                                             |
|----------------------|--------------|-------------------|-----------------|--------------------------------------------------------|
| 6.45                 | singlet,     | 2H                |                 | $\text{H}_2\text{C}=\text{C}$                          |
| 5.88                 | singlet      | 2H                |                 | $\text{H}_2\text{C}=\text{C}$                          |
| 5.17                 | quadruplet   | 52H               | 7.2             | $\text{OCH}(\text{CH}_3)\text{CO}_2$                   |
| 4.20                 | triplet      | 4H                | 6.3             | $\text{OCOCH}_2\text{CH}_2\text{CH}_2\text{OCO}$       |
| 3.45                 | doublet      | 2H                | 16.8            | $(\text{CH}_2=\text{C})\text{CH}_2\text{CO}_2\text{H}$ |
| 3.38                 | doublet      | 2H                | 16.8            | $(\text{CH}_2=\text{C})\text{CH}_2\text{CO}_2\text{H}$ |
| 1.99                 | quintuplet   | 2H                | 6.3             | $\text{OCOCH}_2\text{CH}_2\text{CH}_2\text{OCO}$       |
| 1.57                 | doublet      | 147H              | 7.2             | $\text{OCH}(\text{CH}_3)\text{CO}_2$                   |
| 1.50                 | doublet      | 3H                | 7.2             | $\text{OCH}(\text{CH}_3)\text{CO}_2\text{H}$           |

- $^{13}\text{C}$  NMR (100 MHz,  $\text{CDCl}_3$ ):

| Chemical shift (ppm)             | Assignment                                                              |
|----------------------------------|-------------------------------------------------------------------------|
| 170.1-169.7 ( $\text{m}^{(a)}$ ) | COO                                                                     |
| 132.8                            | C in $\text{H}_2\text{C}=\text{C}$                                      |
| 130.9                            | $\text{CH}_2$ in $\text{H}_2\text{C}=\text{C}$                          |
| 69.6-69.1 (m)                    | CH in $\text{OCH}(\text{CH}_3)\text{CO}_2$                              |
| 61.8                             | $\text{CH}_2$ in $\text{OCOCH}_2\text{CH}_2\text{CH}_2\text{OCO}$       |
| 36.9                             | $\text{CH}_2$ in $(\text{CH}_2=\text{C})\text{CH}_2\text{CO}_2\text{H}$ |
| 27.9                             | $\text{CH}_2$ in $\text{OCOCH}_2\text{CH}_2\text{CH}_2\text{OCO}$       |
| 16.76                            | $\text{CH}_3$ in $\text{OCH}(\text{CH}_3)\text{CO}_2$                   |

<sup>(a)</sup> m means multiplet

- MS (ESI-)  $m/z = [328.1 + (36.03)_n]$  with  $n = 3$  to 50 for  $[\text{C}_{13}\text{H}_{14}\text{O}_8 + (\text{C}_3\text{H}_4\text{O}_2)_n]^{2-}$ .

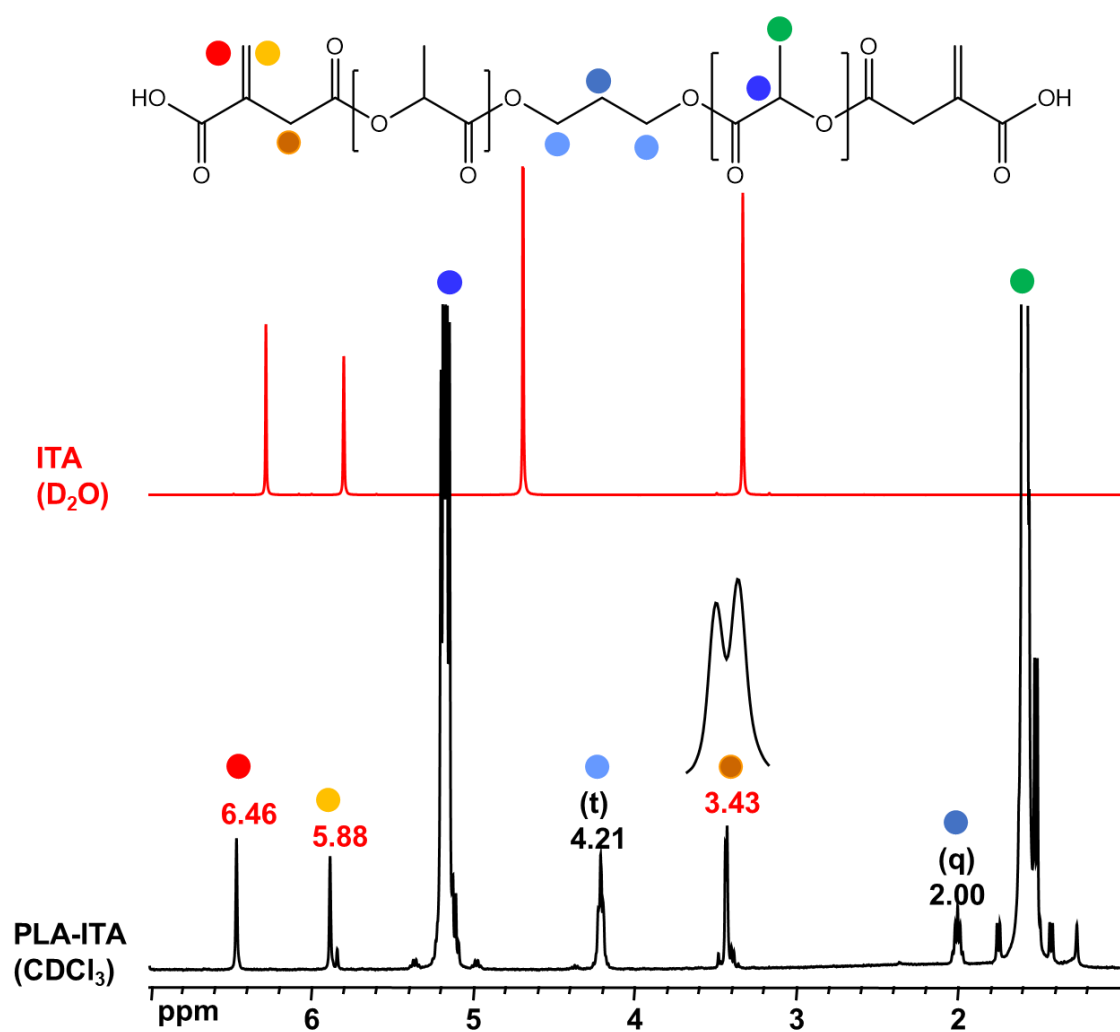

Figure S1.  $^1\text{H}$  NMR spectrum (in  $\text{CDCl}_3$ ) of the itaconate-PLA polymer compared to the spectrum of itaconic acid (in  $\text{D}_2\text{O}$ ).

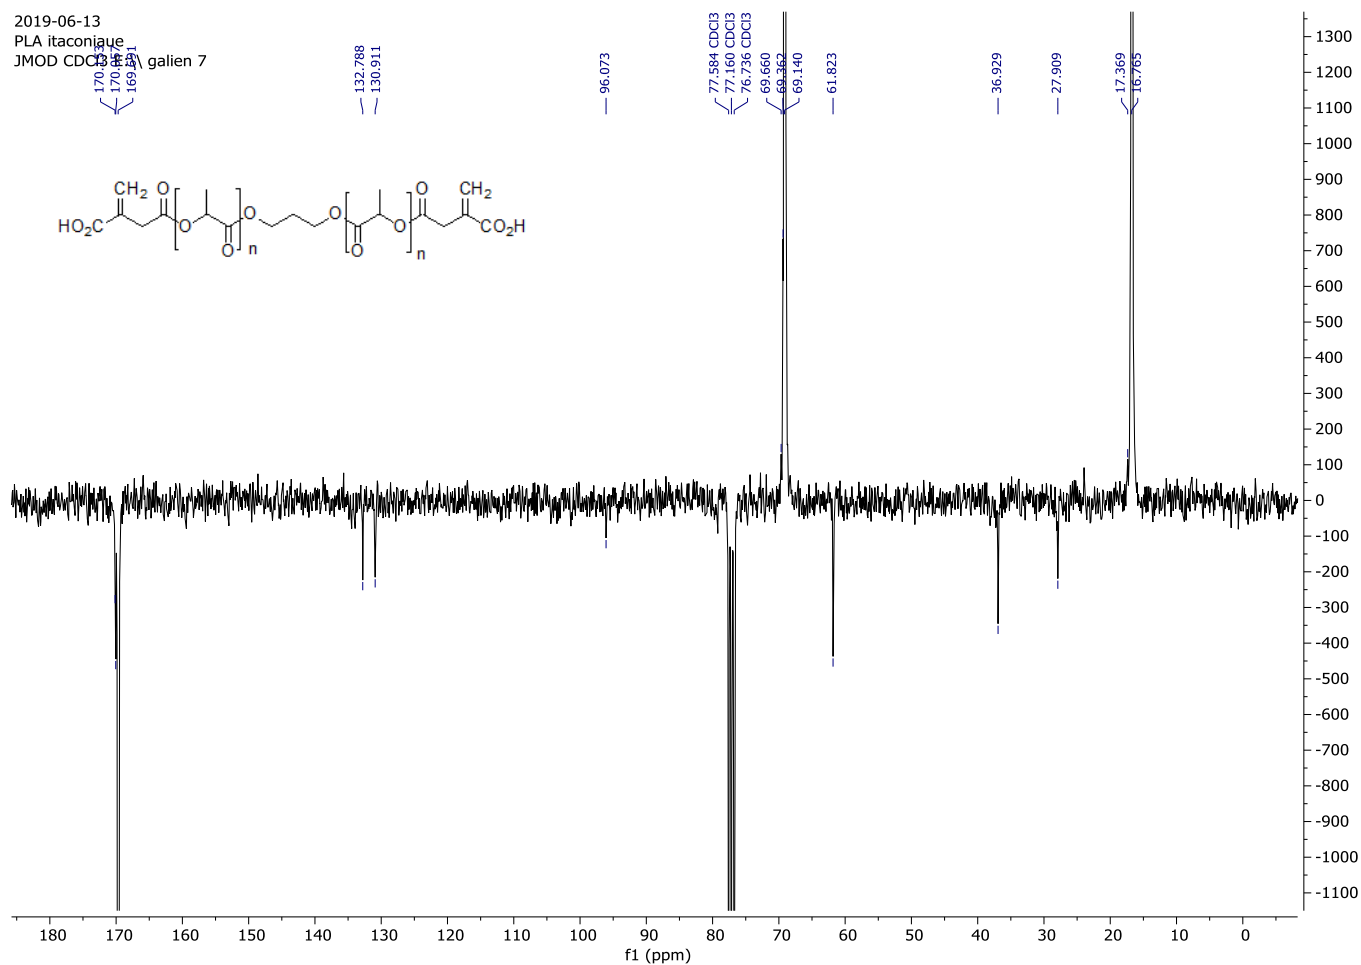

Figure S2. <sup>13</sup>C DEPT-135 NMR spectrum (in CDCl<sub>3</sub>) of the itaconate-PLA polymer.

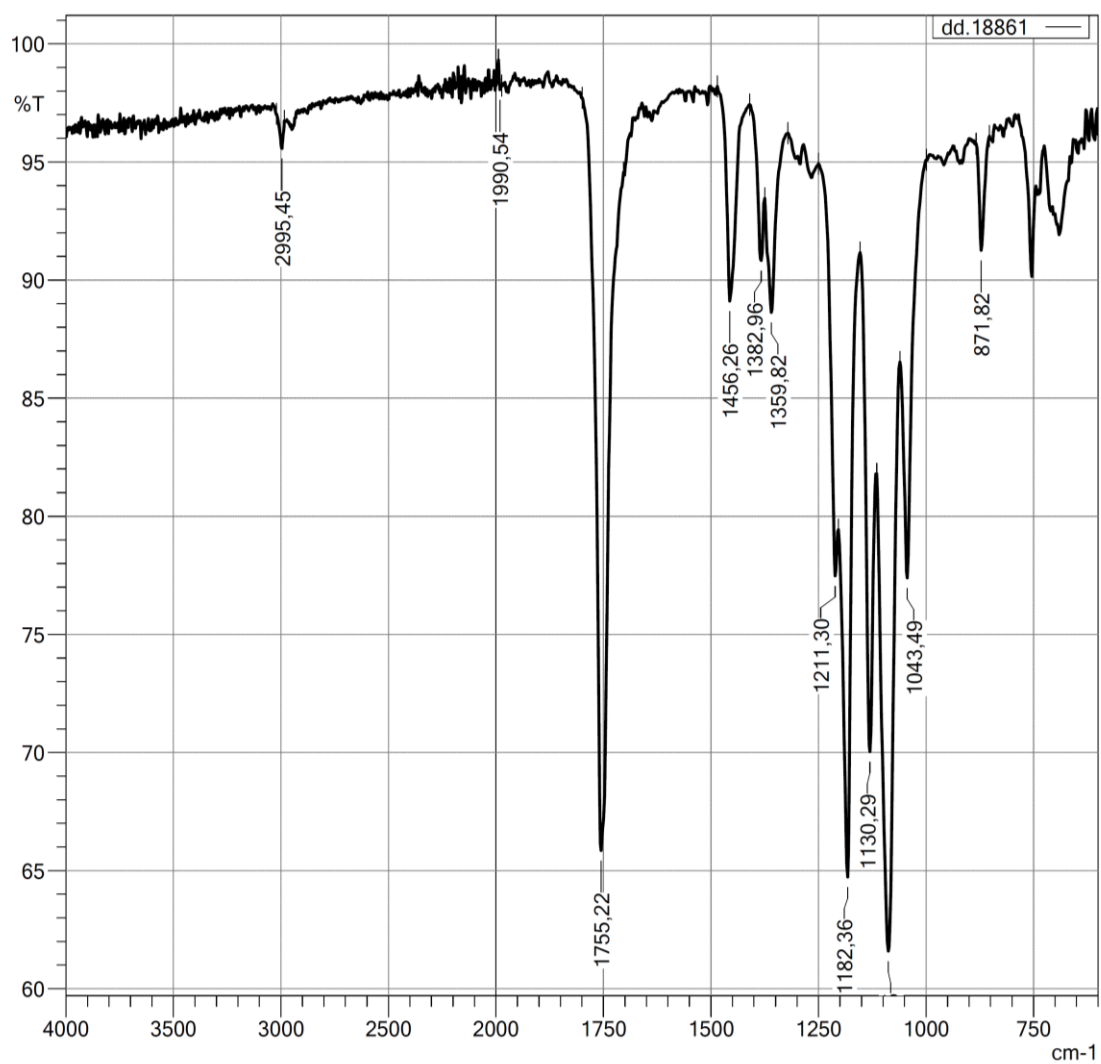

Figure S3. IR spectrum of the itaconate-PLA polymer.

20190607\_dd1887\_190607122056 #48-121 RT: 0.30-0.48 AV: 74 NL: 3.08E6  
F: FTMS - p ESI Full ms [300.00-2000.00]

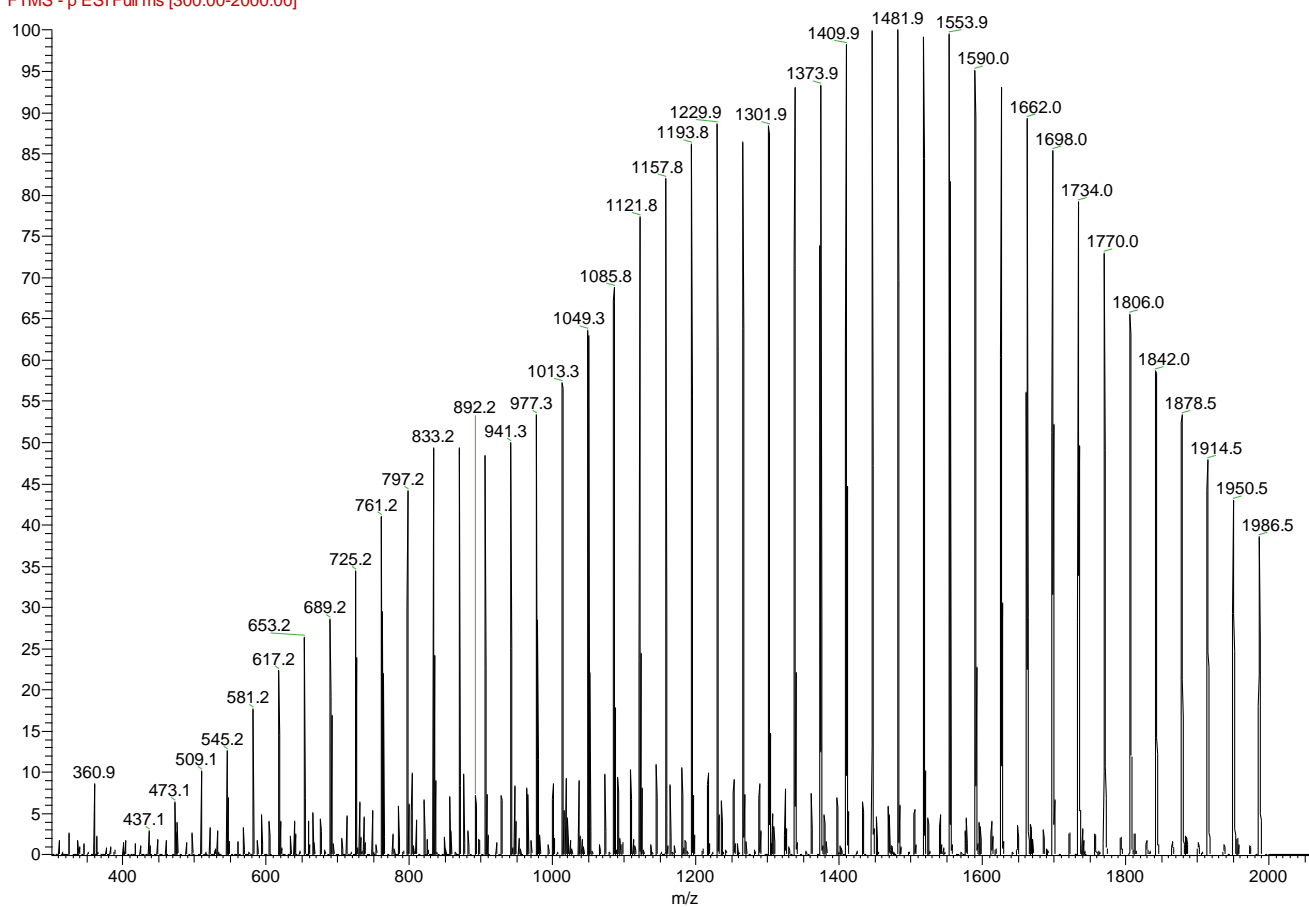

Figure S4. ESI(-) mass spectrum of the itaconate-PLA polymer in MeOH/DCM.

## 2. Preparation of PLA-ITA polymer-drug conjugate nanoparticles

Table S2. Mean hydrodynamic diameter (z\_average) and polydispersity value of several PLA-ITA NPs formulations

| Method                            | [PLA-ITA]<br>(mg.mL <sup>-1</sup> ) | Organic and aqueous<br>phase                                  | z_average<br>(nm) | PdI         | Observation                                   |
|-----------------------------------|-------------------------------------|---------------------------------------------------------------|-------------------|-------------|-----------------------------------------------|
| Single emulsion                   | 5                                   | 1.5 mL dichloromethane,<br>4 mL PVA 4 wt% aqueous<br>solution | 301 ± 12          | 0.13 ± 0.02 | some precipitate after<br>solvent evaporation |
|                                   | 10                                  |                                                               | 310 ± 7           | 0.12 ± 0.09 |                                               |
|                                   | 15                                  |                                                               | 331 ± 12          | 0.05 ± 0.03 |                                               |
|                                   | 20                                  |                                                               | 323 ± 14          | 0.07 ± 0.01 |                                               |
| Nanoprecipitation                 | 5, 10, 15, 20                       | 1.5 mL acetone, 4 mL<br>PVA 4 wt% aqueous so-<br>lution       | aggregate         |             |                                               |
| Nanoprecipitation<br>small volume | 5                                   | 0.75 mL acetone, 2 mL DI<br>water                             | 343 ± 36          | 0.49 ± 0.07 |                                               |

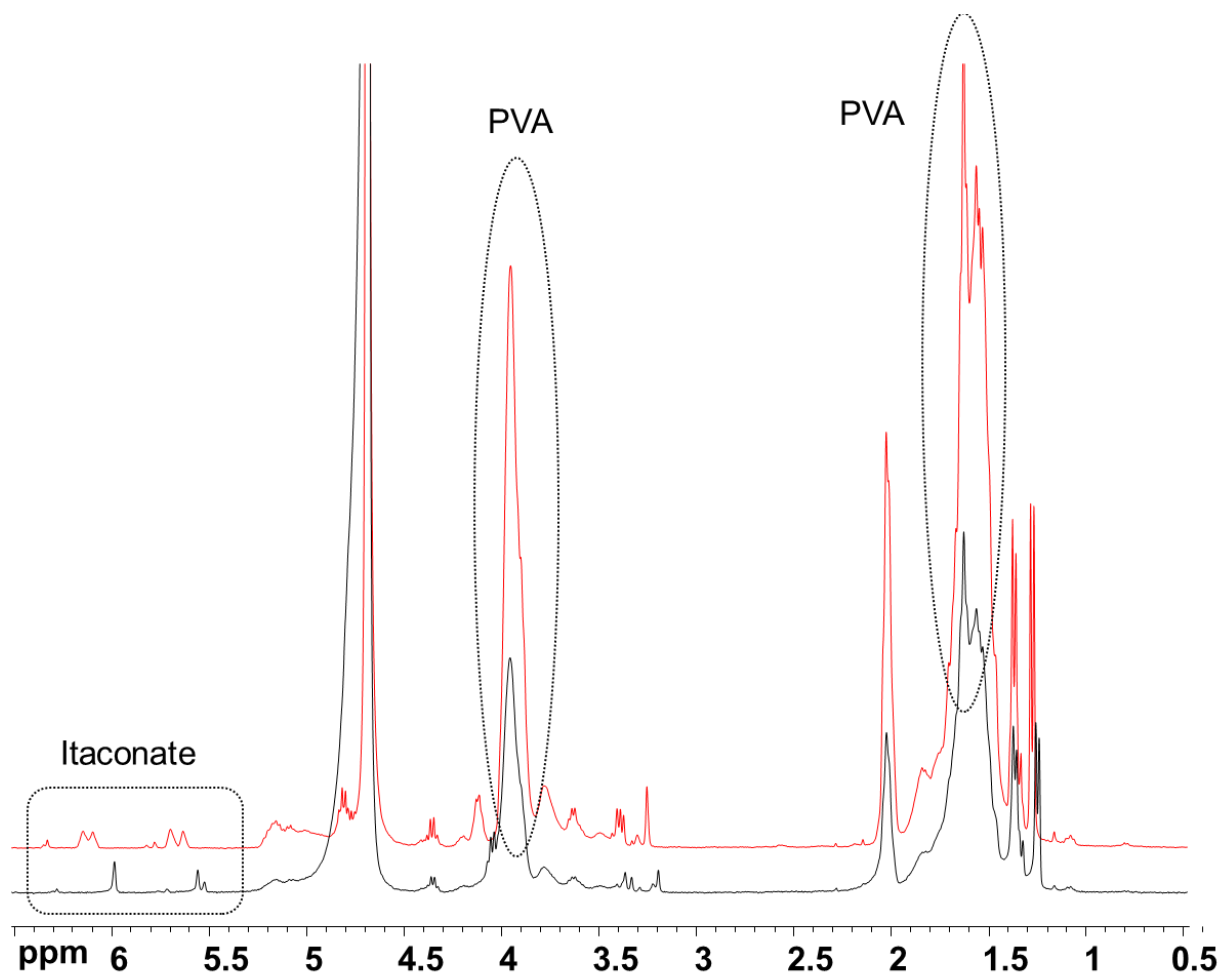

Figure S5. <sup>1</sup>H NMR spectra of water-soluble degradation products of PLA-ITA single emulsion degraded in pH 7.4 and 5.3 for 1 month 11 days.

### 3. Identification of degradation products of PLA-ITA nanoparticles

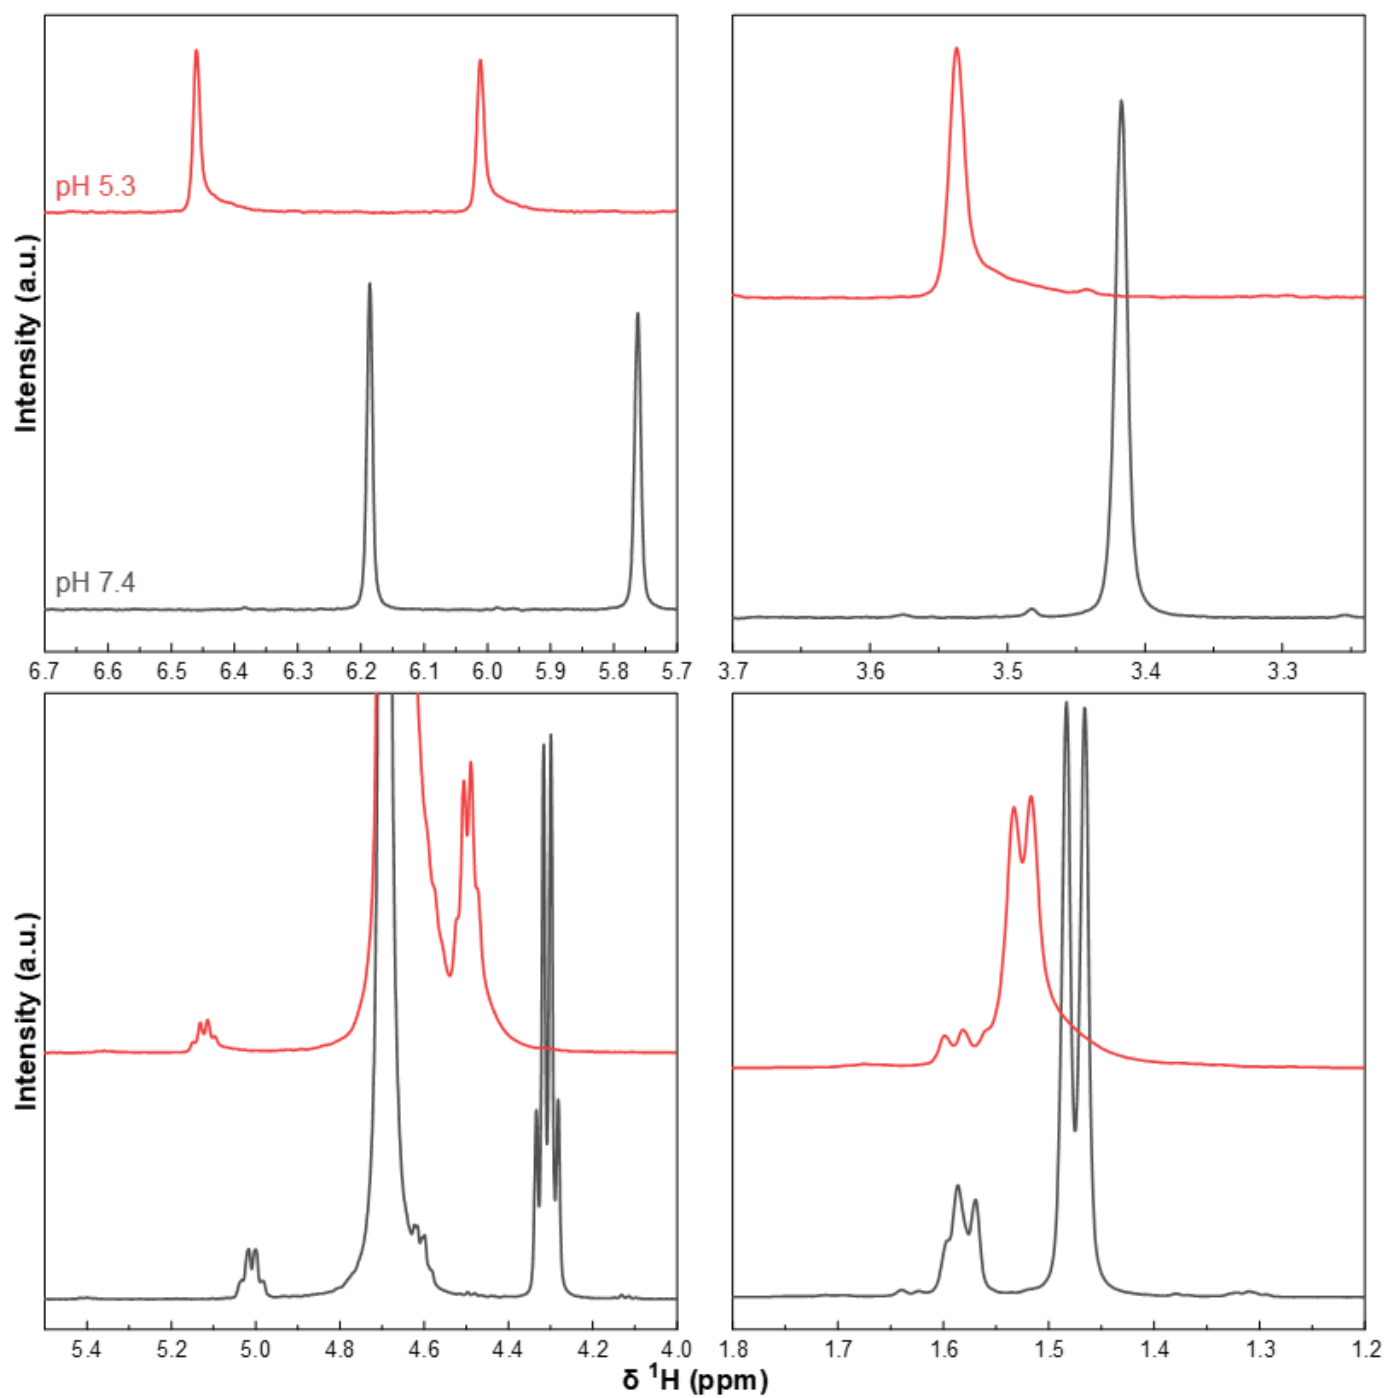

Figure S6. Zoom in  $^1\text{H}$  NMR spectra of itaconic acid and lactic acid solution mixture incubated at pH 5.3 and 7.4 for 1 month.

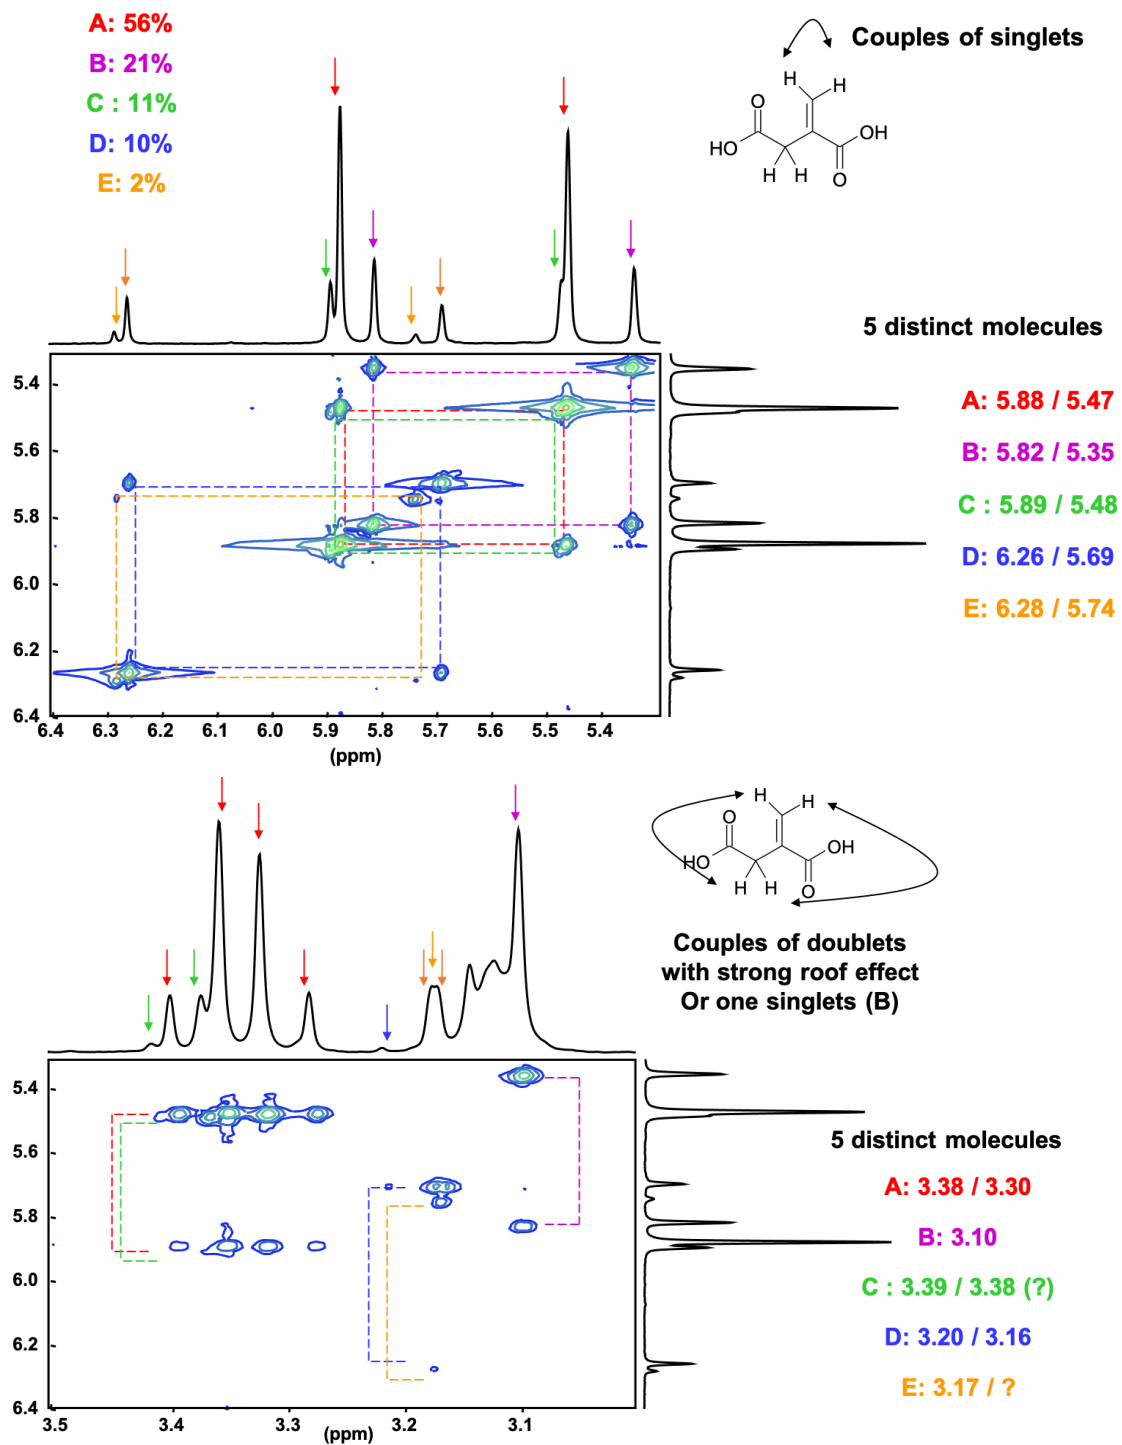

Figure S7. Zoom on ITA resonances in the  $^1\text{H}$ - $^1\text{H}$  COSY NMR spectrum of water-soluble degradation products of PLA-ITA nanoprecipitation degraded at pH 7.4 for 2 months.



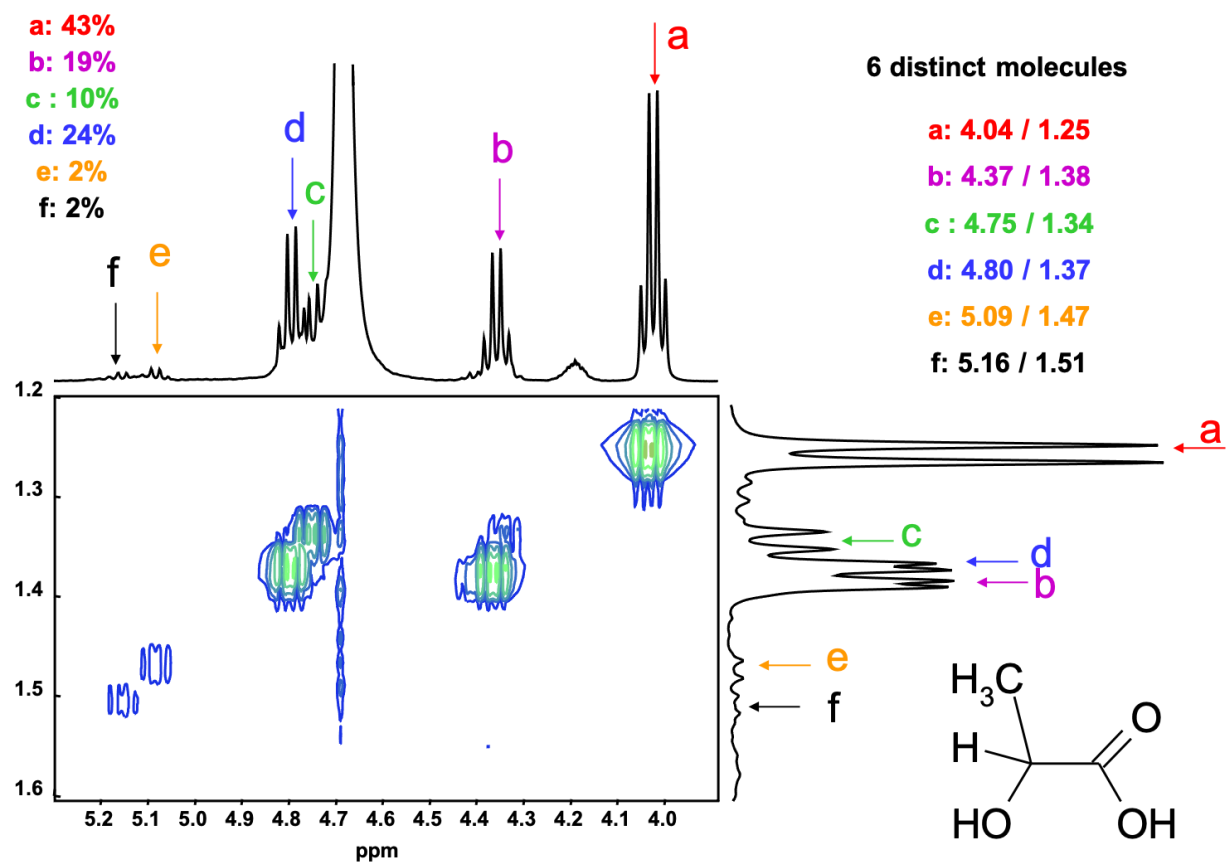

Figure S8. Zoom on LA resonances in the  $^1\text{H}$ - $^1\text{H}$  COSY NMR spectrum of water-soluble degradation products of PLA-ITA nanoprecipitation degraded at pH 7.4 for 2 months.

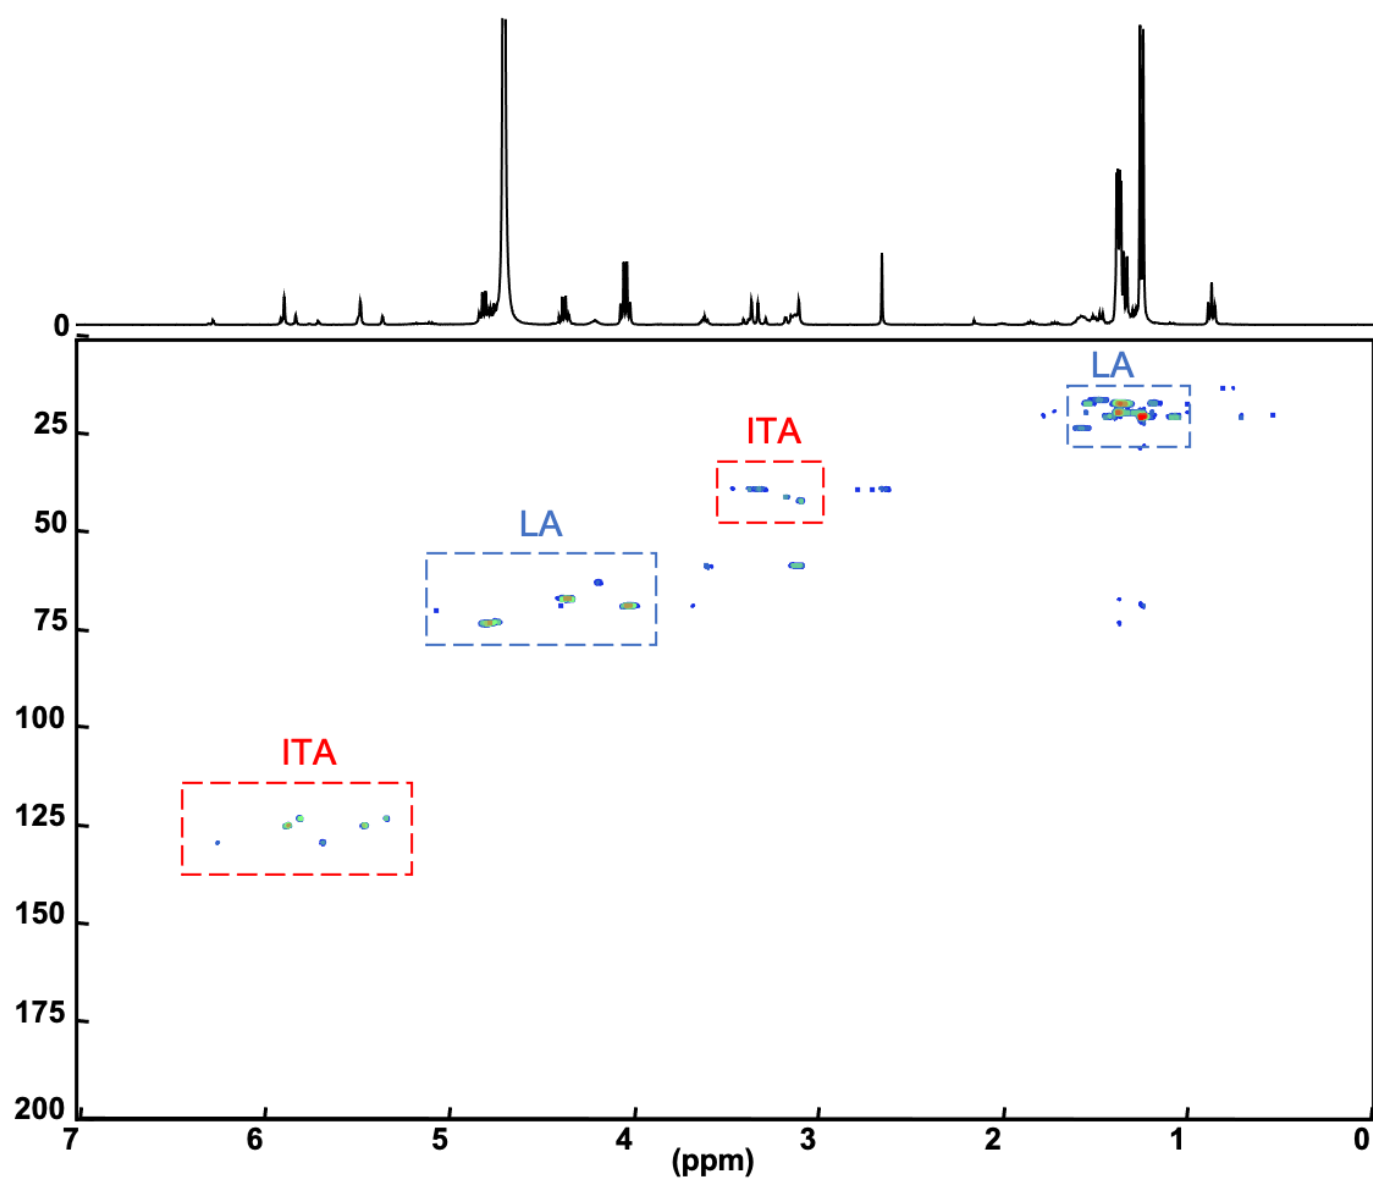

Figure S9.  $^1\text{H}$ - $^{13}\text{C}$  HSQC NMR spectra of water-soluble degradation products of PLA-ITA nanoprecipitation degraded at pH 7.4 for 2 months.

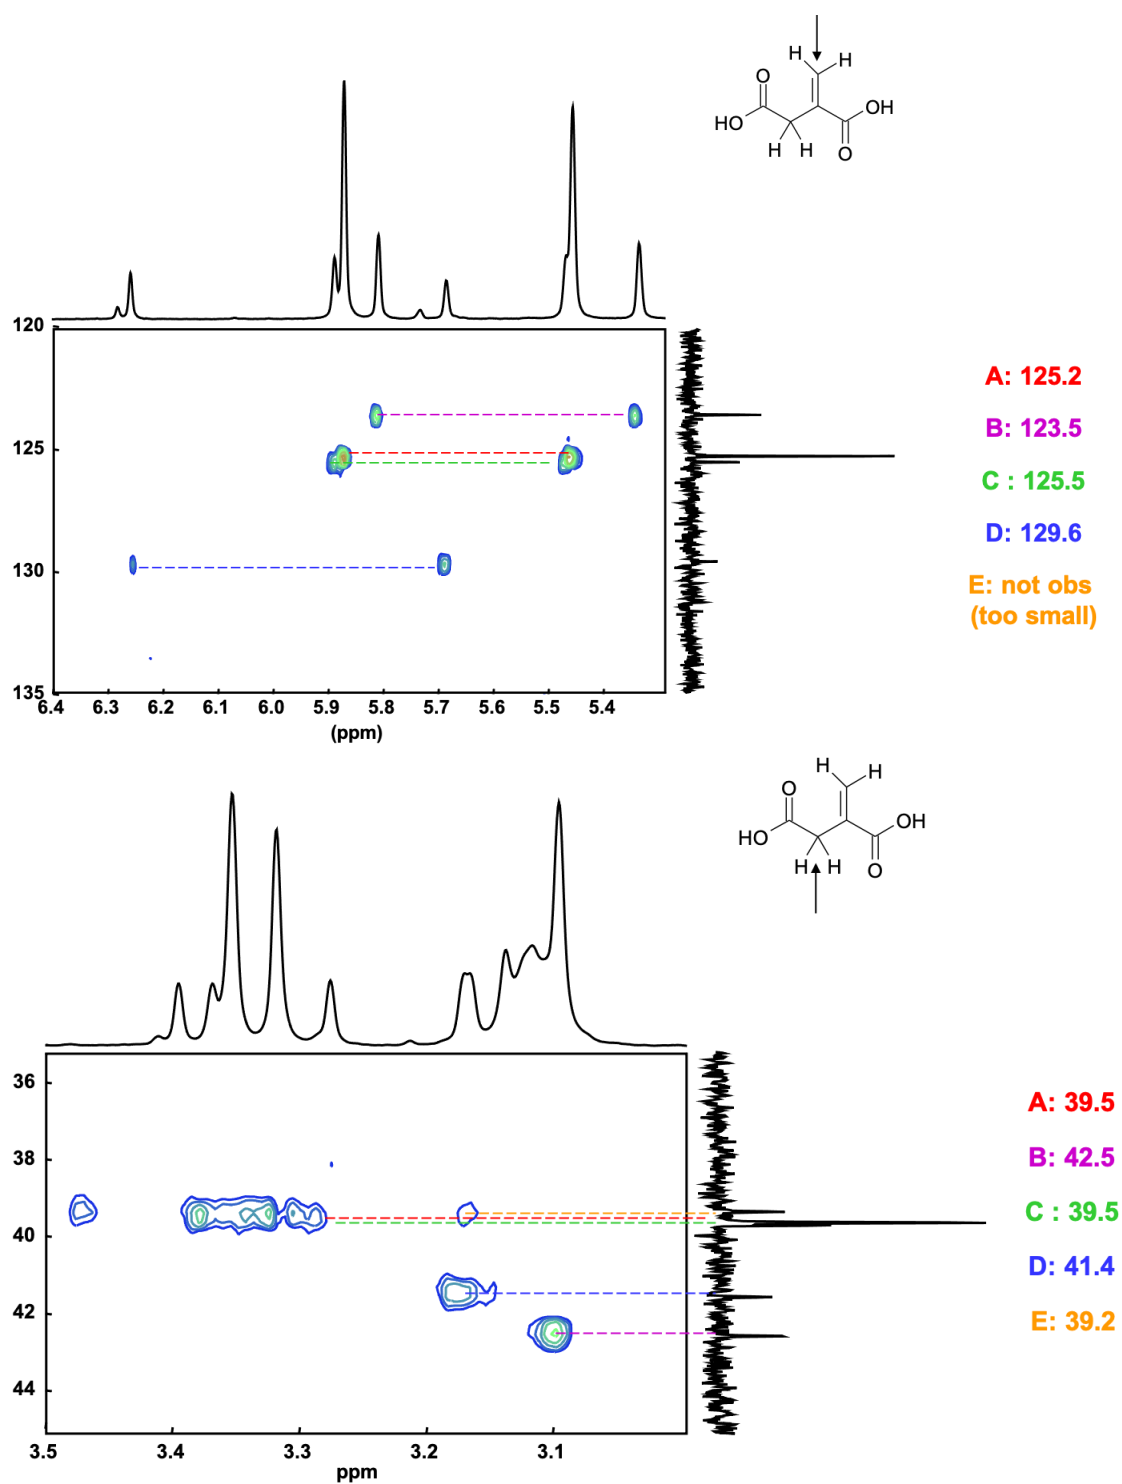

Figure S10. Zoom on ITA resonances in the  $^1\text{H}$ - $^{13}\text{C}$  HSQC NMR spectra of water-soluble degradation products of PLA-ITA nanoprecipitation degraded at pH 7.4 for 2 months.

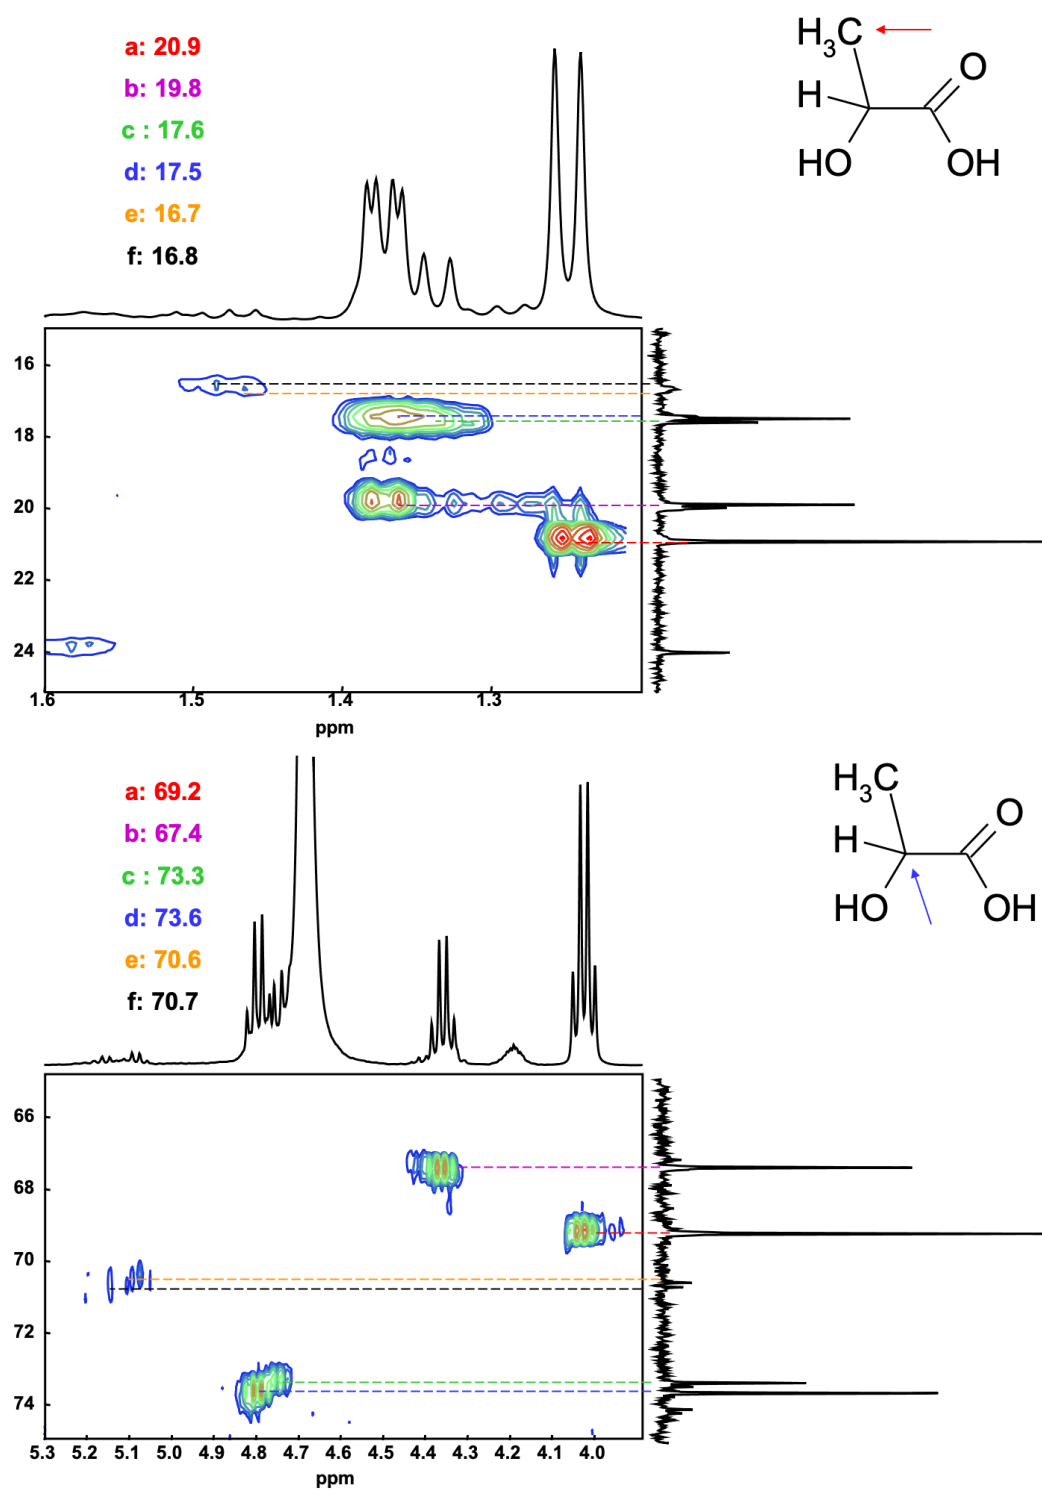

Figure S11. Zoom on LA resonances in the  $^1\text{H}$ - $^{13}\text{C}$  HSQC NMR spectra of water-soluble degradation products of PLA-ITA nanoprecipitation degraded at pH 7.4 for 2 months.

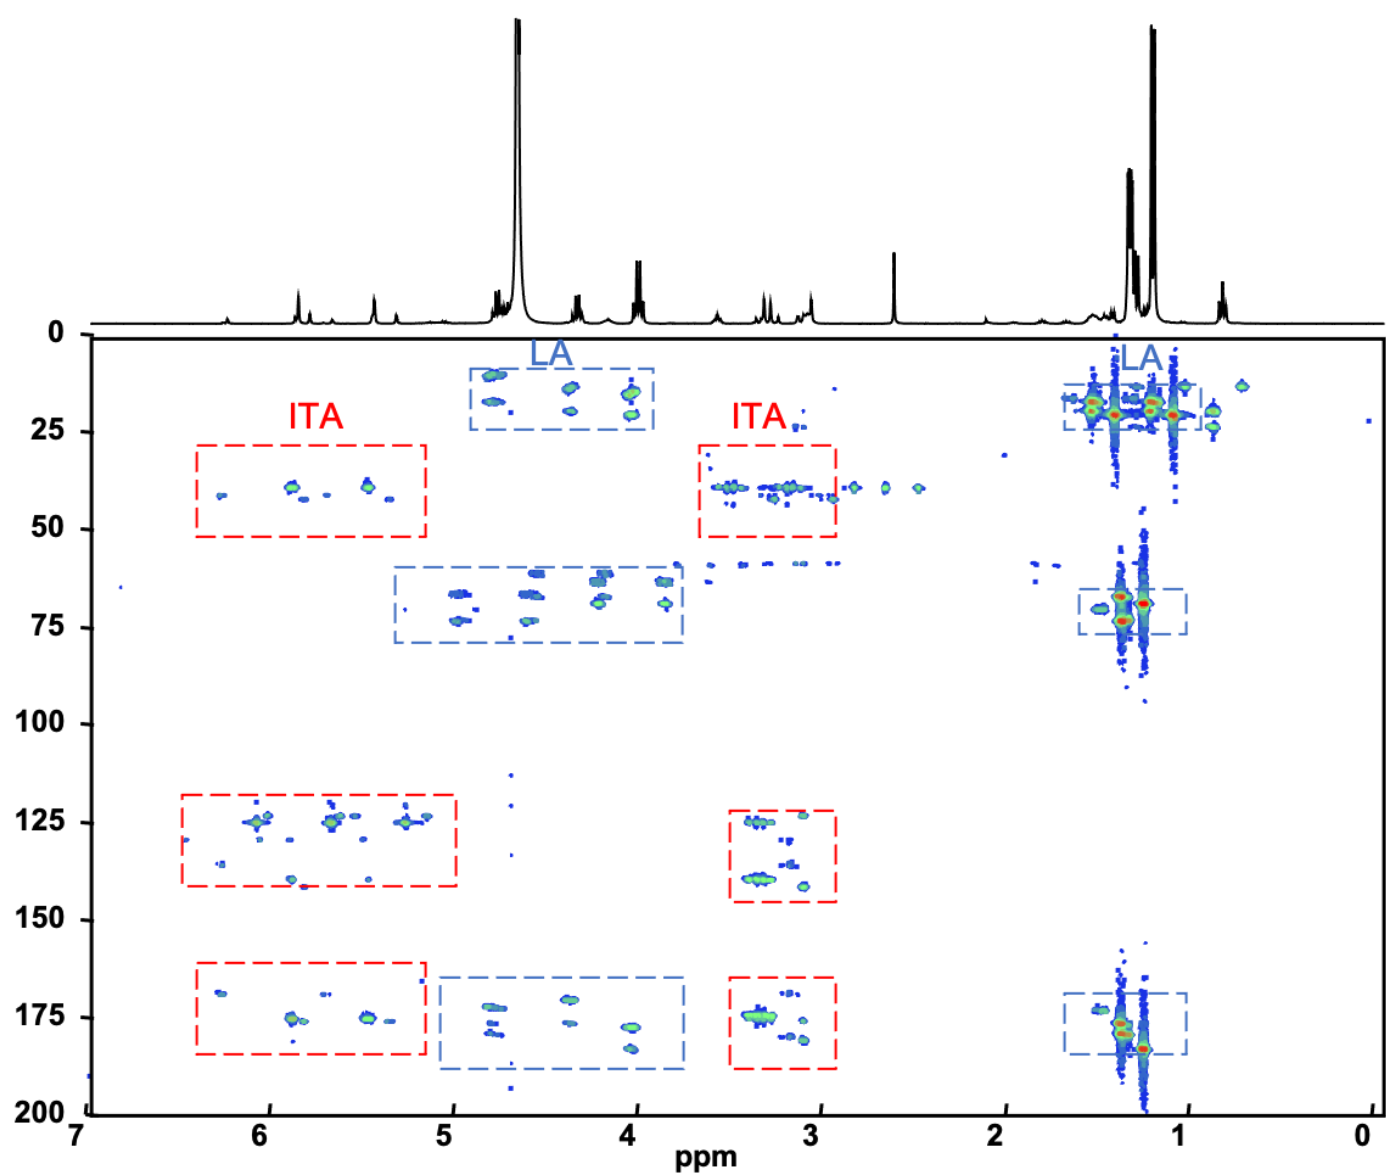

Figure S12.  $^1\text{H}$ - $^{13}\text{C}$  HMBC NMR spectra of water-soluble degradation products of PLA-ITA nanoprecipitation degraded at pH 7.4 for 2 months.

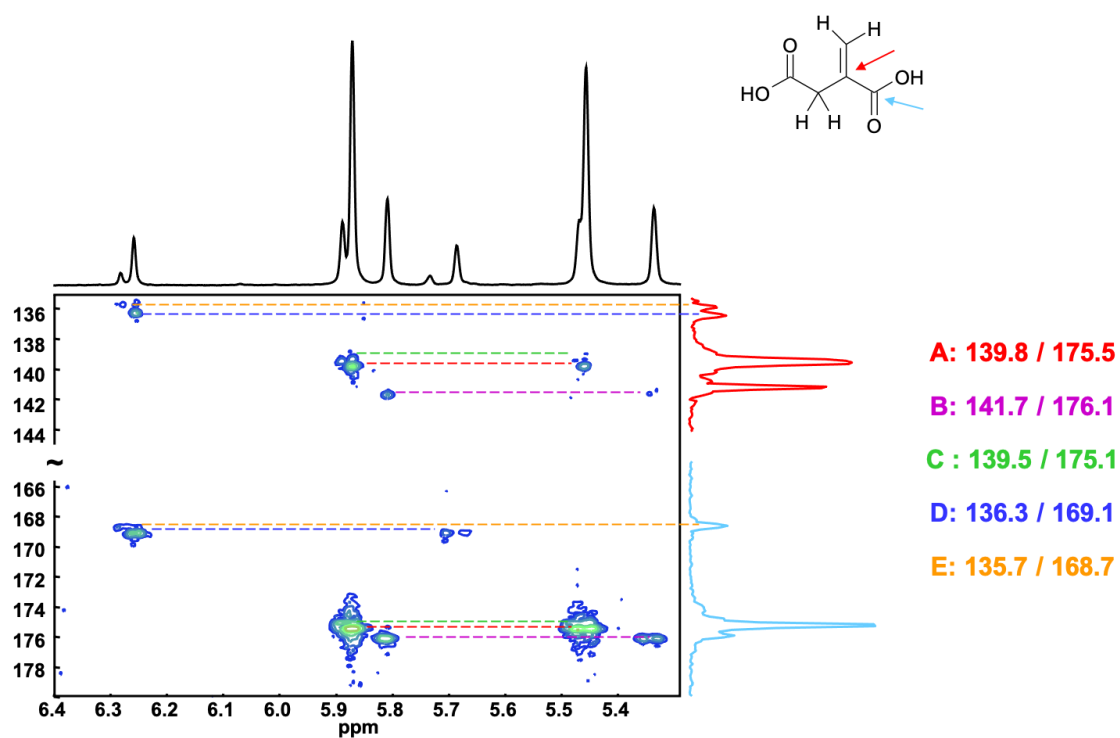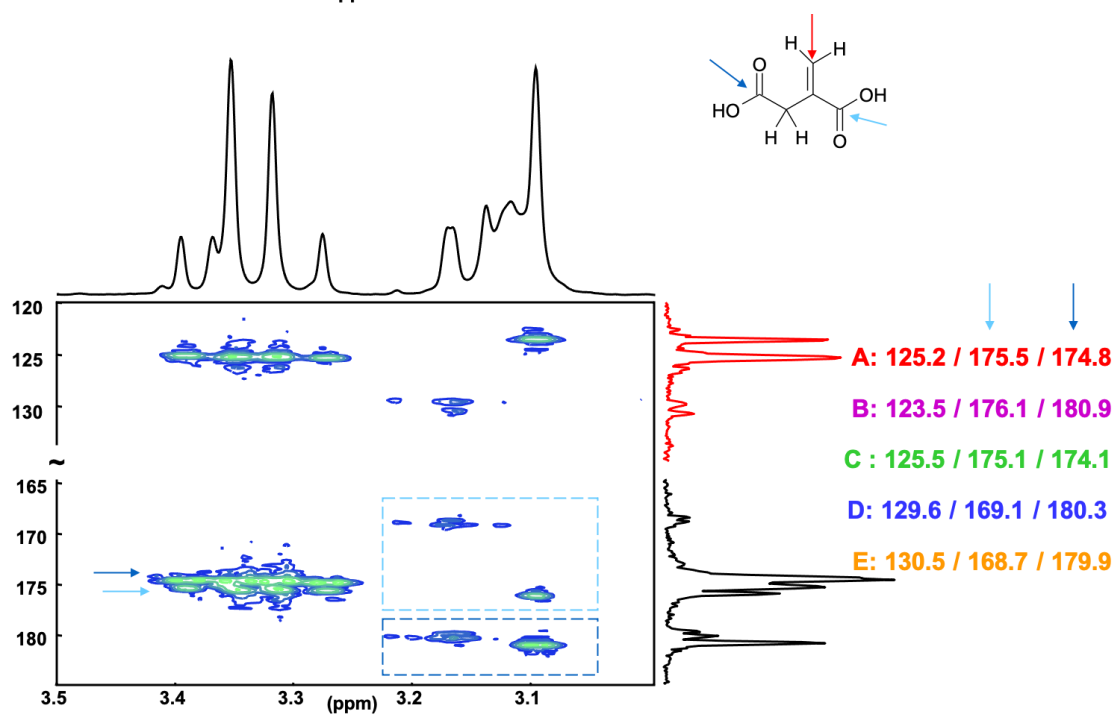

Figure S13. Zoom on ITA resonances in the  $^1\text{H}$ - $^{13}\text{C}$  HMBC NMR spectra of water-soluble degradation products of PLA-ITA nanoprecipitation degraded at pH 7.4 for 2 months.

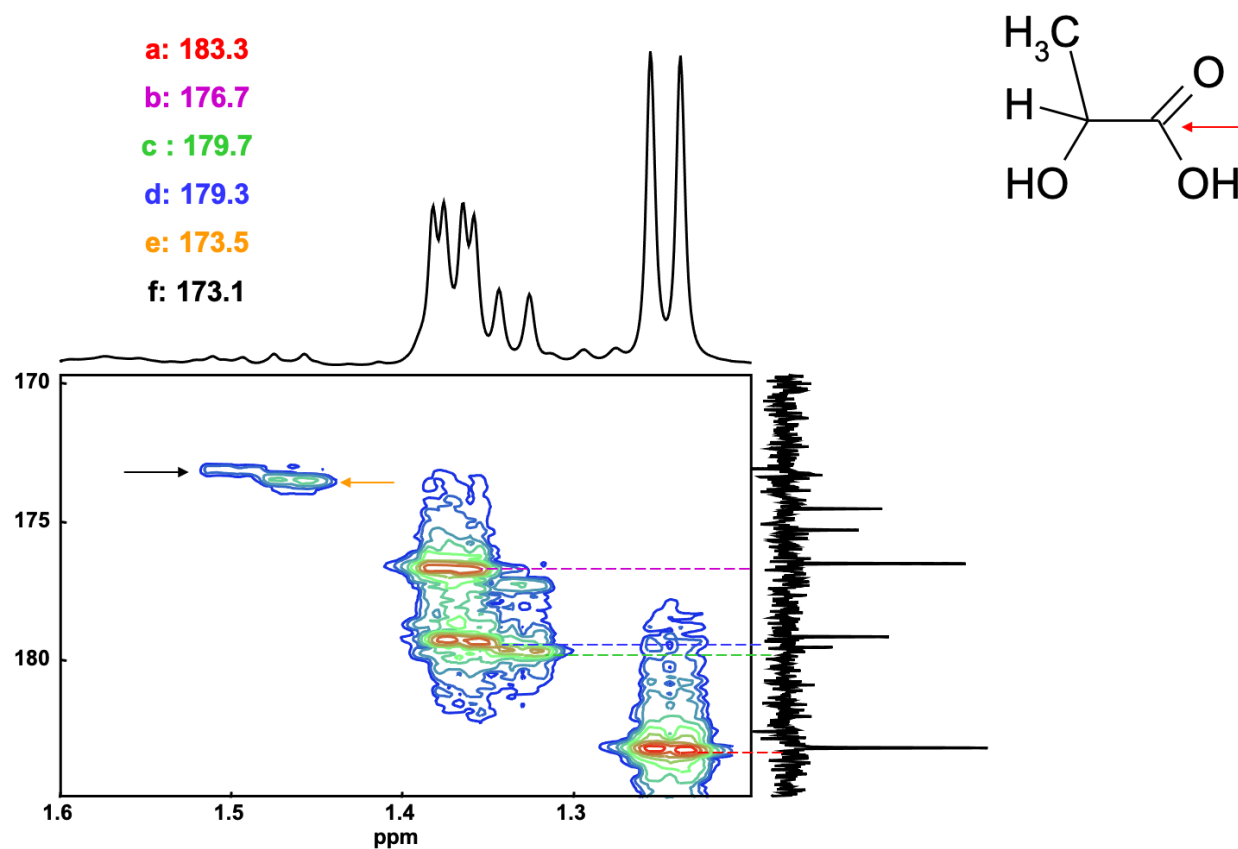

Figure S14. Zoom on LA resonances in the  $^1\text{H}$ - $^{13}\text{C}$  HMBC NMR spectra of water-soluble degradation products of PLA-ITA nanoprecipitation degraded at pH 7.4 for 2 months.

20211126\_MVP06 #75-98 RT: 0.38-0.50 AV: 24 NL: 6.01E5  
F: ITMS -p ESI Full ms [50.00-700.00]

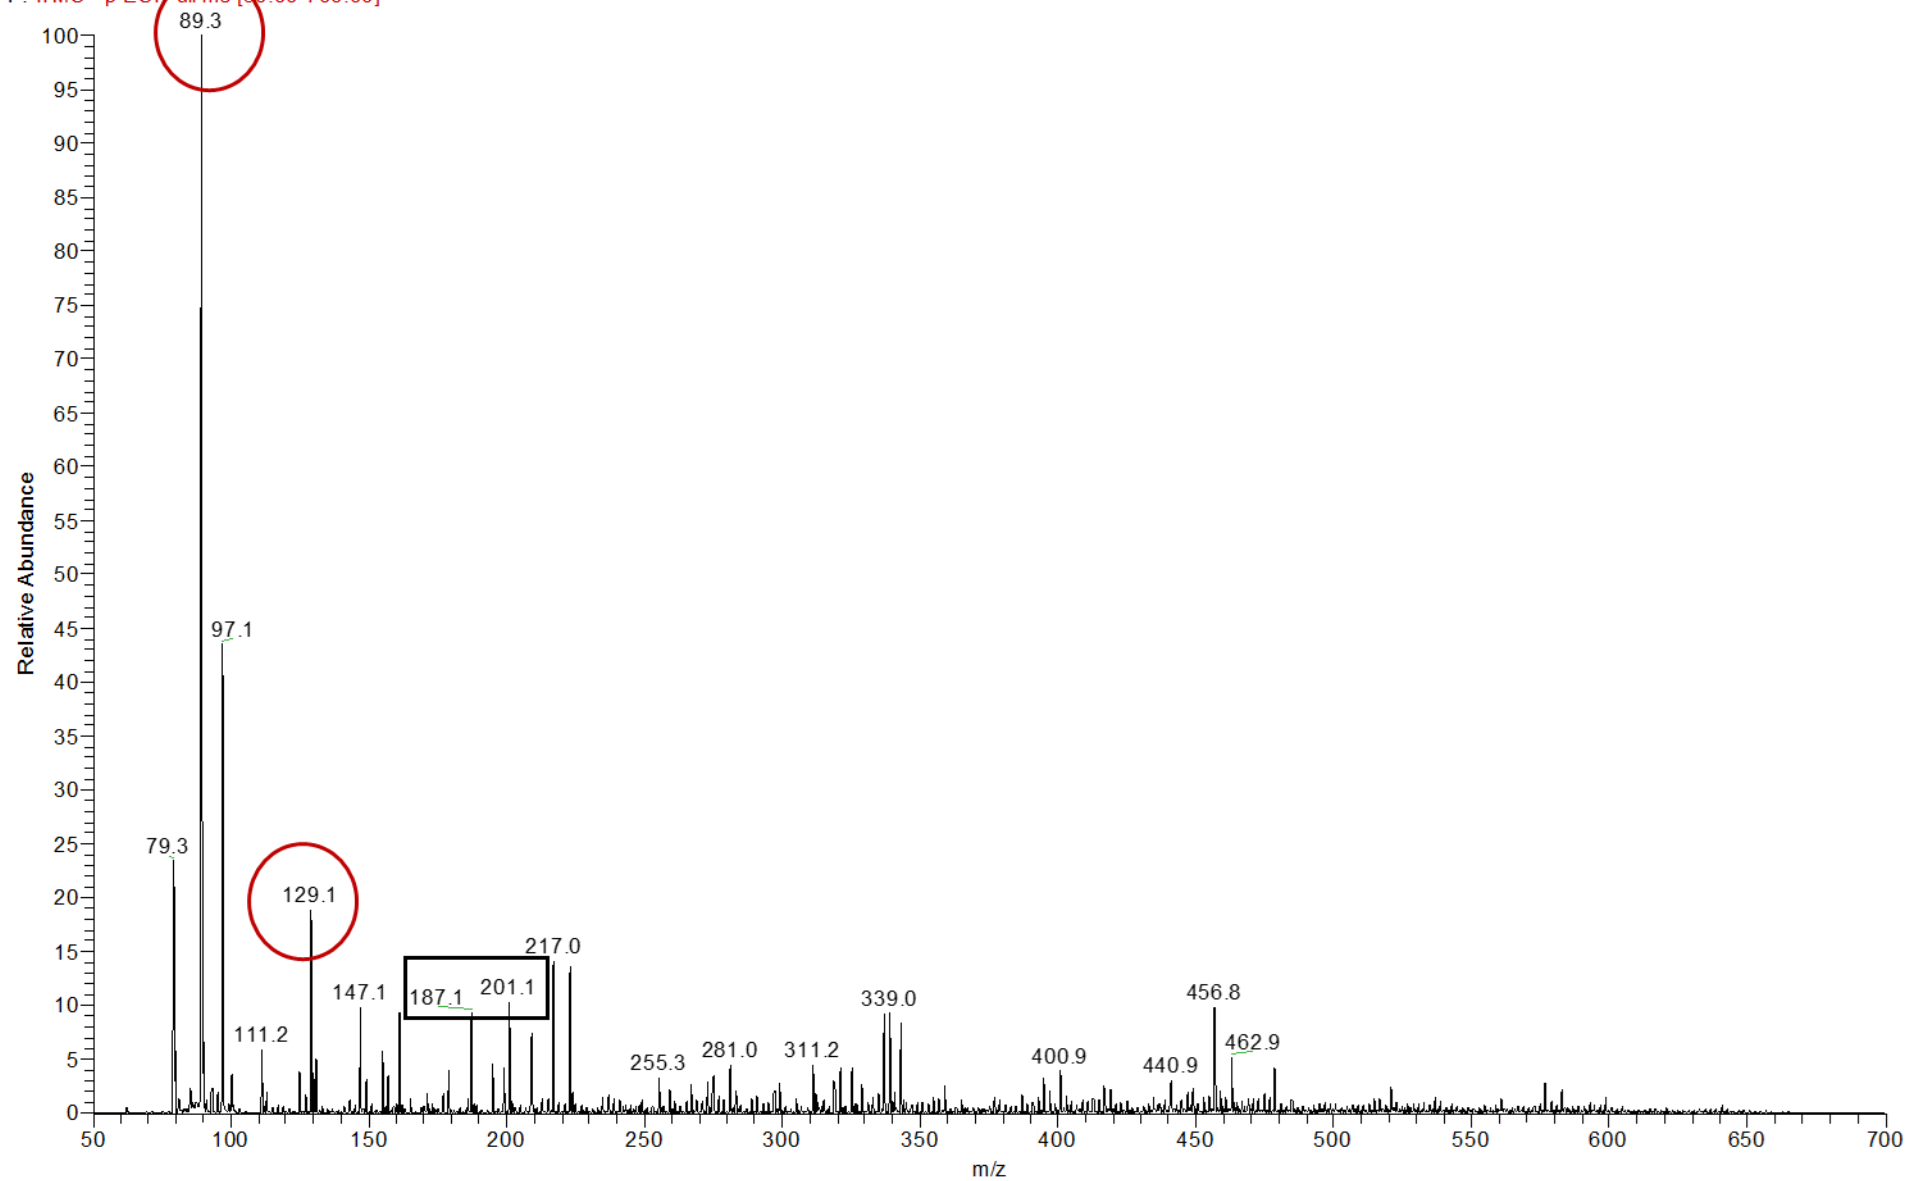

Figure S15. ESI(-) Mass spectrum of water-soluble degradation products of PLA-ITA nanoprecipitation obtained after degradation in PBS at pH 7.4 for 2 months.



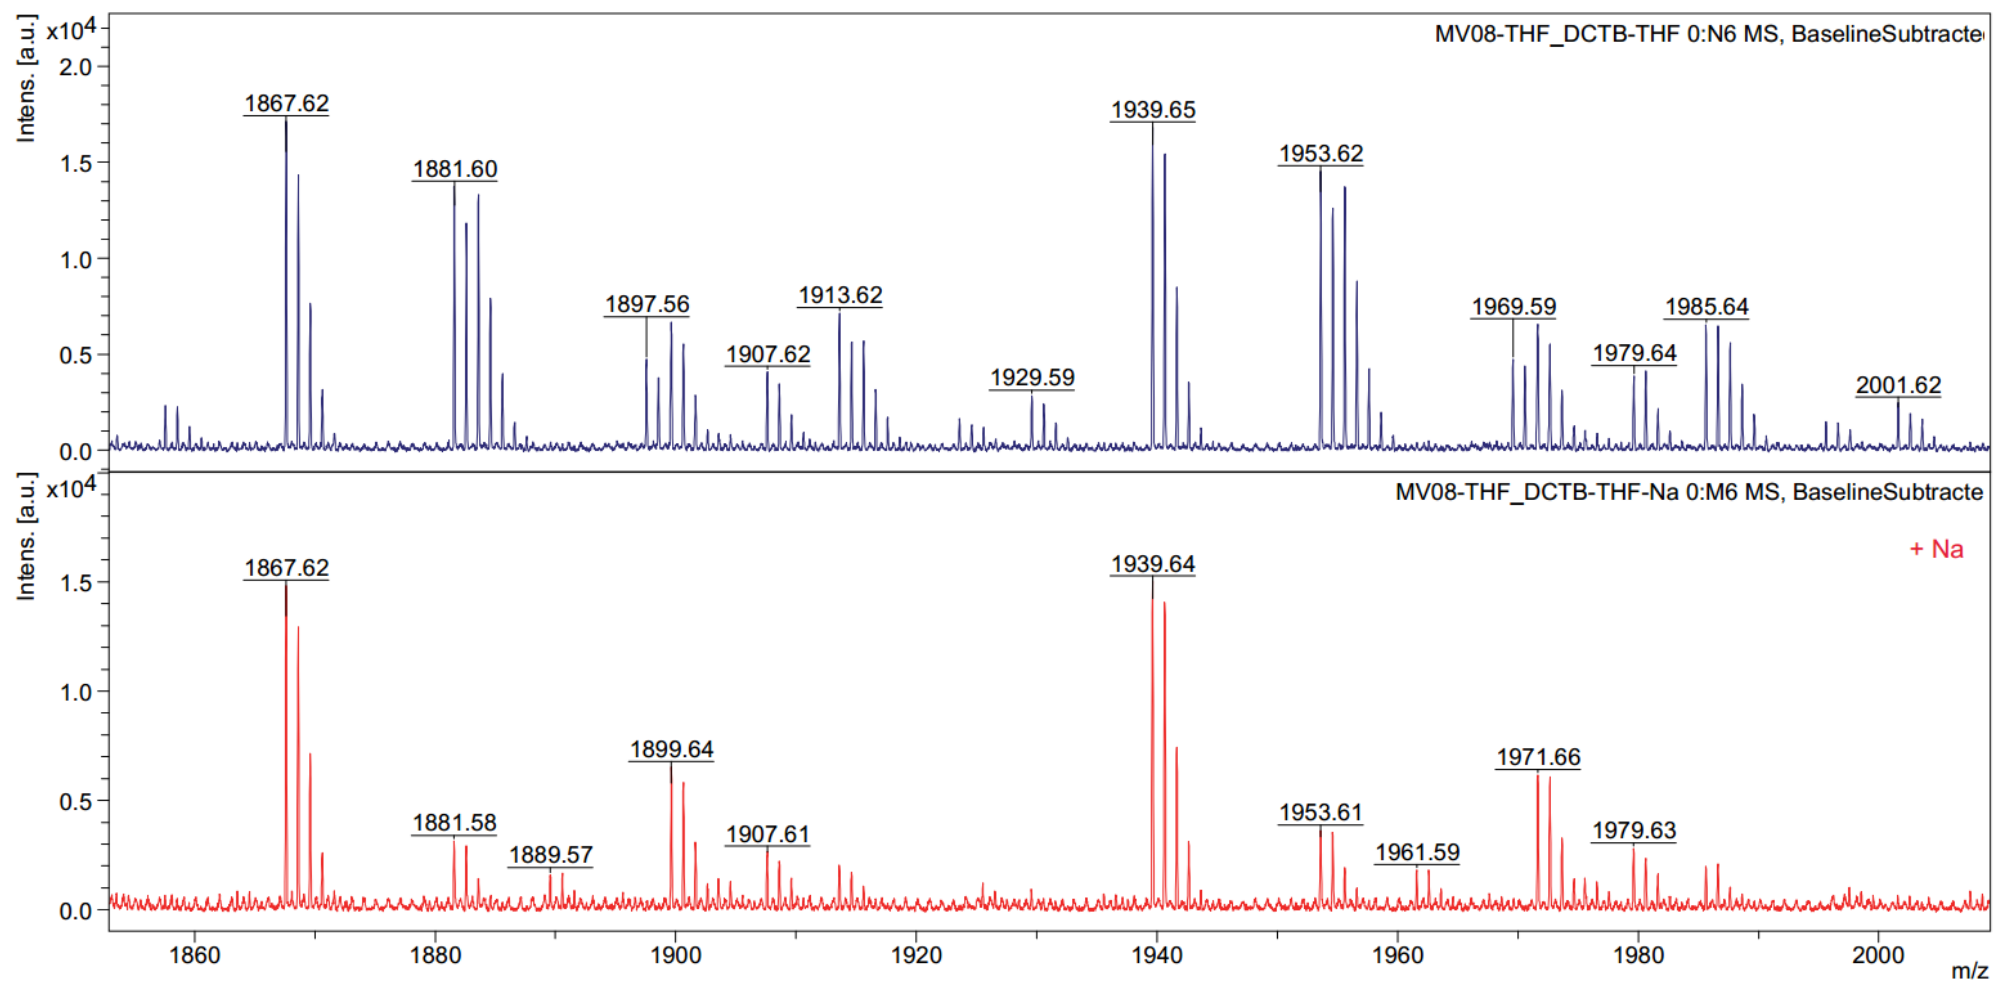

Figure S16. MALDI Mass spectrum of degraded PLA-ITA pellet at pH 5.3.

#### 4. Degradation mechanism of PLA-ITA nanoparticles

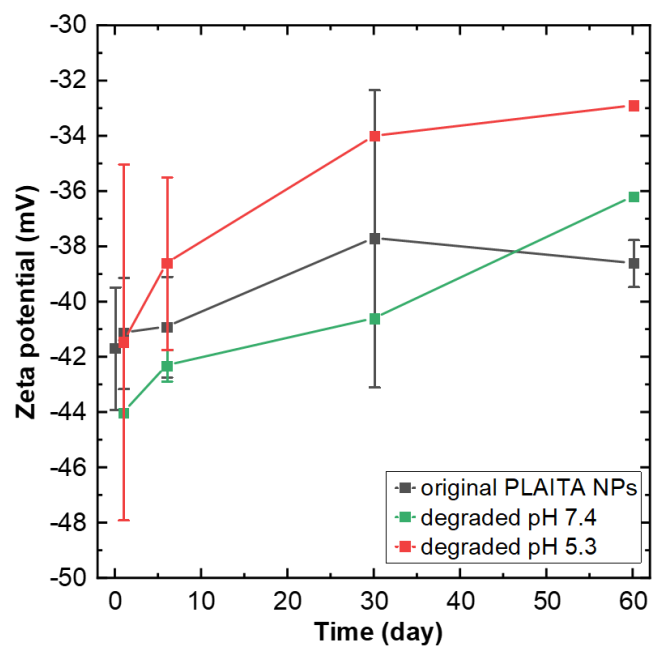

Figure S17. Evolution of zeta-potential of original and degraded PLA-ITA NPs suspension.

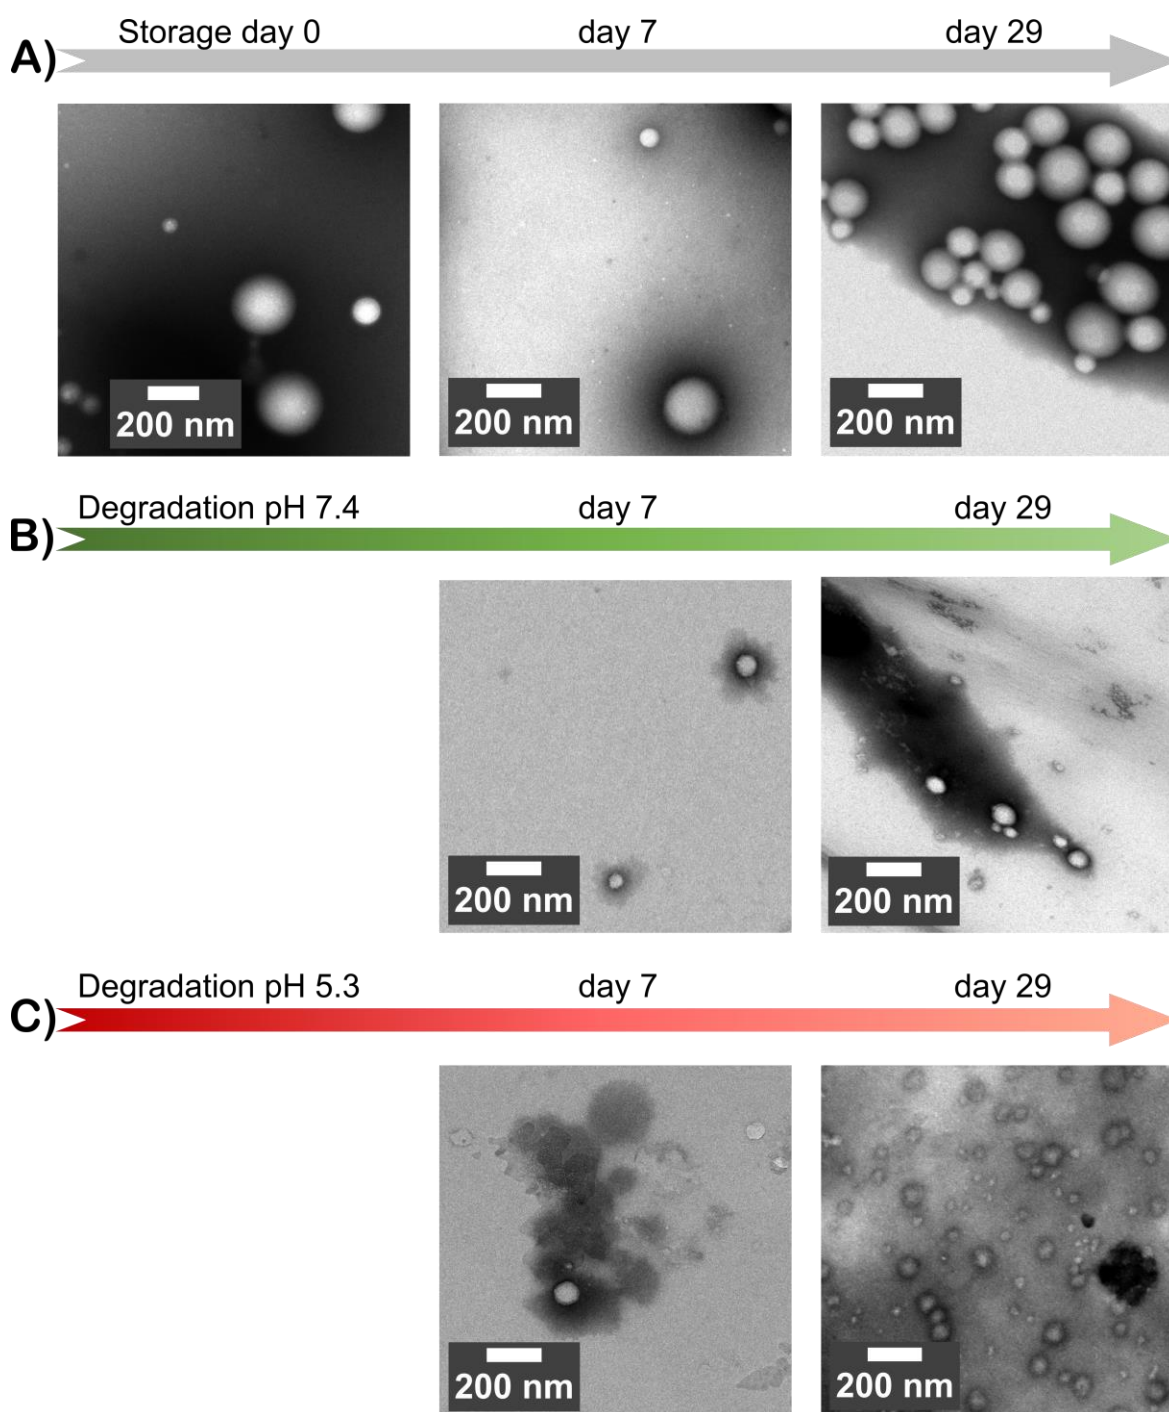

Figure S18. TEM images of PLA NPs in a 1-month course: (A) original, and degraded at (B) pH 7.4, and (C) pH 5.3.
